# Supplementary material
Source: PubMed Central journal article supplement (PMC3720820)
Supplement: NIHMS456473-supplement-s1.pdf [file NIHMS456473-supplement-s1.pdf]

### Online Supplements

*Online Supplement 1.* The chosen model for Analysis 1a. The predictors are orthogonalized time polynomials to the 4th level, Talk (1 = Talk, 0 = Listen), End (1 = Segment end, 0 = Segment beginning), Low (1 = Low target velocity, 0 = Medium target velocity), High (1 = High target velocity, 0 = Medium target velocity). Because our dataset was large and included many data points, we used the normal distribution approximation for significance tests for the coefficients in the chosen model (Long, 2012). These are shown as the Z and p values for the different coefficients.

| <i>Effect</i>     | <i>Estimate</i> | <i>SE</i> | <i>Z</i> | <i>p</i> |
|-------------------|-----------------|-----------|----------|----------|
| (Intercept)       | 38.85           | 1.65      | 23.61    | 0 ***    |
| Time              | -11.45          | 2.51      | -4.56    | 0 ***    |
| Time <sup>2</sup> | -1.36           | 2.38      | -0.57    | 0.567    |
| Talk              | 5.57            | 0.51      | 10.97    | 0 ***    |
| End               | -4.02           | 0.51      | -7.91    | 0 ***    |
| Low               | -22.43          | 0.51      | -44.18   | 0 ***    |
| High              | 22.74           | 0.51      | 44.8     | 0 ***    |
| Talk:End          | -0.45           | 0.72      | -0.62    | 0.533    |
| Talk:Low          | -1.78           | 0.72      | -2.48    | 0.013 *  |
| Talk:High         | 2.56            | 0.72      | 3.56     | 0 ***    |
| End:Low           | 4.89            | 0.72      | 6.82     | 0 ***    |
| End:High          | 0.74            | 0.72      | 1.02     | 0.306    |
| Time:Talk         | 18.19           | 3.21      | 5.67     | 0 ***    |
| Time:End          | 16.18           | 3.21      | 5.04     | 0 ***    |

|                                  |        |      |       |       |     |
|----------------------------------|--------|------|-------|-------|-----|
| Time:Low                         | 14.47  | 3.21 | 4.51  | 0     | *** |
| Time:High                        | 4.33   | 3.21 | 1.35  | 0.177 |     |
| Time <sup>2</sup> :Talk          | -4.28  | 3.21 | -1.33 | 0.182 |     |
| Time <sup>2</sup> :End           | 3      | 3.21 | 0.93  | 0.35  |     |
| Time <sup>2</sup> :Low           | 3.11   | 3.21 | 0.97  | 0.333 |     |
| Time <sup>2</sup> :High          | -1.38  | 3.21 | -0.43 | 0.667 |     |
| Talk:End:Low                     | -1.71  | 1.02 | -1.68 | 0.093 | .   |
| Talk:End:High                    | -1.2   | 1.02 | -1.18 | 0.238 |     |
| Time:Talk:End                    | -23.55 | 4.54 | -5.19 | 0     | *** |
| Time:Talk:Low                    | -15.78 | 4.54 | -3.48 | 0.001 | *** |
| Time:Talk:High                   | -4.72  | 4.54 | -1.04 | 0.299 |     |
| Time:End:Low                     | -18.3  | 4.54 | -4.03 | 0     | *** |
| Time:End:High                    | -4.59  | 4.54 | -1.01 | 0.312 |     |
| Time <sup>2</sup> :Talk:End      | 3.47   | 4.54 | 0.76  | 0.444 |     |
| Time <sup>2</sup> :Talk:Low      | 2.95   | 4.54 | 0.65  | 0.516 |     |
| Time <sup>2</sup> :Talk:High     | 4.24   | 4.54 | 0.93  | 0.35  |     |
| Time <sup>2</sup> :End:Low       | -9.14  | 4.54 | -2.01 | 0.044 | *   |
| Time <sup>2</sup> :End:High      | -9.68  | 4.54 | -2.13 | 0.033 | *   |
| Time:Talk:End:Low                | 18.45  | 6.42 | 2.87  | 0.004 | **  |
| Time:Talk:End:High               | 3.99   | 6.42 | 0.62  | 0.535 |     |
| Time <sup>2</sup> :Talk:End:Low  | 7.29   | 6.42 | 1.14  | 0.256 |     |
| Time <sup>2</sup> :Talk:End:High | 5.12   | 6.42 | 0.8   | 0.425 |     |

---

*Online Supplement 2.* The chosen model for Analysis 1b. The predictors are orthogonalized time polynomials to the 4<sup>th</sup> level, Talk (1 = Talk, 0 = Listen), Prepare (1 = Prepare, 0 = Listen), End-segment (1 = Segment end, 0 = Segment beginning), Low (1 = Low velocity, 0 = Medium velocity), High (1 = High velocity, 0 = Medium velocity).

| <i>Effect</i>              | <i>Estimate</i> | <i>SE</i> | <i>Z</i> | <i>p</i> |     |
|----------------------------|-----------------|-----------|----------|----------|-----|
| (Intercept)                | 34.84           | 1.69      | 20.66    | 0        | *** |
| Time                       | 4.73            | 2.97      | 1.59     | 0.111    |     |
| Time <sup>2</sup>          | 1.64            | 2.47      | 0.66     | 0.507    |     |
| Prepare                    | 3.41            | 0.48      | 7.09     | 0        | *** |
| Talk                       | 5.12            | 0.48      | 10.65    | 0        | *** |
| Low                        | -17.53          | 0.48      | -36.47   | 0        | *** |
| High                       | 23.48           | 0.48      | 48.84    | 0        | *** |
| Prepare:Low                | -2.18           | 0.68      | -3.21    | 0.001    | **  |
| Talk:Low                   | -3.48           | 0.68      | -5.12    | 0        | *** |
| Prepare:High               | 3.03            | 0.68      | 4.46     | 0        | *** |
| Talk:High                  | 1.36            | 0.68      | 2        | 0.046    | *   |
| Time:Prepare               | 6.92            | 3.04      | 2.27     | 0.023    | *   |
| Time:Talk                  | -5.36           | 3.04      | -1.76    | 0.078    | .   |
| Time:Low                   | -3.83           | 3.04      | -1.26    | 0.208    |     |
| Time:High                  | -0.26           | 3.04      | -0.09    | 0.932    |     |
| Time <sup>2</sup> :Prepare | 0.11            | 3.04      | 0.04     | 0.971    |     |
| Time <sup>2</sup> :Talk    | -0.81           | 3.04      | -0.27    | 0.79     |     |
| Time <sup>2</sup> :Low     | -6.03           | 3.04      | -1.98    | 0.047    | *   |

|                                 |        |      |       |       |     |
|---------------------------------|--------|------|-------|-------|-----|
| Time <sup>2</sup> :High         | -11.06 | 3.04 | -3.64 | 0     | *** |
| Time:Prepare:Low                | -3.36  | 4.3  | -0.78 | 0.435 |     |
| Time:Talk:Low                   | 2.66   | 4.3  | 0.62  | 0.536 |     |
| Time:Prepare:High               | 0.76   | 4.3  | 0.18  | 0.859 |     |
| Time:Talk:High                  | -0.73  | 4.3  | -0.17 | 0.865 |     |
| Time <sup>2</sup> :Prepare:Low  | 1.63   | 4.3  | 0.38  | 0.705 |     |
| Time <sup>2</sup> :Talk:Low     | 10.24  | 4.3  | 2.38  | 0.017 | *   |
| Time <sup>2</sup> :Prepare:High | 12.03  | 4.3  | 2.8   | 0.005 | **  |
| Time <sup>2</sup> :Talk:High    | 9.36   | 4.3  | 2.18  | 0.03  | *   |

---

*Online Supplement 3.* The chosen model for Analysis 2a. The predictors are orthogonalized time polynomials to the 4th level, Talk (1 = Talk, 0 = Listen), End (1 = Segment end, 0 = Segment beginning), Low (1 = Low target velocity, 0 = Medium target velocity), High (1 = High target velocity, 0 = Medium target velocity). Because our dataset was large and included many data points, we used the normal distribution approximation for significance tests for the coefficients in the chosen model (Long, 2012). These are shown as the Z and p values for the different coefficients.

| <i>Effect</i>     | <i>Estimate</i> | <i>SE</i> | <i>Z</i> | <i>p</i> |
|-------------------|-----------------|-----------|----------|----------|
| (Intercept)       | 39.84           | 2.35      | 16.96    | 0 ***    |
| Time              | -1.07           | 4.24      | -0.25    | 0.802    |
| Time <sup>2</sup> | -0.66           | 3.42      | -0.19    | 0.847    |
| Talk              | -0.18           | 0.75      | -0.24    | 0.81     |
| End               | -0.76           | 0.75      | -1       | 0.316    |
| Low               | -24.81          | 0.75      | -32.93   | 0 ***    |
| High              | 13.33           | 0.75      | 17.69    | 0 ***    |
| Talk:End          | -1.15           | 1.08      | -1.07    | 0.286    |
| Talk:Low          | 1.42            | 1.07      | 1.33     | 0.182    |
| Talk:High         | 3.1             | 1.07      | 2.91     | 0.004 ** |
| End:Low           | 1.33            | 1.08      | 1.24     | 0.215    |
| End:High          | -1.87           | 1.07      | -1.76    | 0.079 .  |
| Time:Talk         | -2.12           | 4.79      | -0.44    | 0.657    |
| Time:End          | 10.79           | 4.76      | 2.26     | 0.024 *  |
| Time:Low          | 0.03            | 4.76      | 0.01     | 0.995    |

|                                  |        |      |       |       |     |
|----------------------------------|--------|------|-------|-------|-----|
| Time:High                        | -14.65 | 4.76 | -3.07 | 0.002 | **  |
| Time <sup>2</sup> :Talk          | -1.07  | 4.79 | -0.22 | 0.823 |     |
| Time <sup>2</sup> :End           | -14.86 | 4.76 | -3.12 | 0.002 | **  |
| Time <sup>2</sup> :Low           | 0.42   | 4.76 | 0.09  | 0.93  |     |
| Time <sup>2</sup> :High          | 3.73   | 4.76 | 0.78  | 0.434 |     |
| Talk:End:Low                     | 0.98   | 1.52 | 0.64  | 0.519 |     |
| Talk:End:High                    | 11.08  | 1.51 | 7.31  | 0     | *** |
| Time:Talk:End                    | -8.24  | 6.81 | -1.21 | 0.227 |     |
| Time:Talk:Low                    | 1.29   | 6.75 | 0.19  | 0.848 |     |
| Time:Talk:High                   | 22.97  | 6.75 | 3.4   | 0.001 | *** |
| Time:End:Low                     | -8.55  | 6.8  | -1.26 | 0.209 |     |
| Time:End:High                    | 14.14  | 6.74 | 2.1   | 0.036 | *   |
| Time <sup>2</sup> :Talk:End      | 19.35  | 6.81 | 2.84  | 0.004 | **  |
| Time <sup>2</sup> :Talk:Low      | 1.35   | 6.75 | 0.2   | 0.842 |     |
| Time <sup>2</sup> :Talk:High     | 6.35   | 6.75 | 0.94  | 0.347 |     |
| Time <sup>2</sup> :End:Low       | 11.16  | 6.79 | 1.64  | 0.101 |     |
| Time <sup>2</sup> :End:High      | 18.53  | 6.74 | 2.75  | 0.006 | **  |
| Time:Talk:End:Low                | -0.96  | 9.62 | -0.1  | 0.921 |     |
| Time:Talk:End:High               | -34.2  | 9.58 | -3.57 | 0     | *** |
| Time <sup>2</sup> :Talk:End:Low  | -15.17 | 9.62 | -1.58 | 0.115 |     |
| Time <sup>2</sup> :Talk:End:High | -36.25 | 9.58 | -3.78 | 0     | *** |

---

*Online Supplement 4.* The chosen model for Analysis 2b. The predictors are orthogonalized time polynomials to the 4<sup>th</sup> level, Talk (1 = Talk, 0 = Listen), Prepare (1 = Prepare, 0 = Listen), End-segment (1 = Segment end, 0 = Segment beginning), Low (1 = Low velocity, 0 = Medium velocity), High (1 = High velocity, 0 = Medium velocity).

| <i>Effect</i>              | <i>Estimate</i> | <i>SE</i> | <i>Z</i> | <i>p</i> |     |
|----------------------------|-----------------|-----------|----------|----------|-----|
| (Intercept)                | 39.08           | 2.4       | 16.3     | 0        | *** |
| Time <sup>3</sup>          | -4.94           | 1.94      | -2.55    | 0.011    | *   |
| Prepare                    | -1.73           | 0.74      | -2.33    | 0.02     | *   |
| Talk                       | -1.41           | 0.76      | -1.87    | 0.062    | .   |
| Time <sup>2</sup>          | -15.52          | 3.64      | -4.26    | 0        | *** |
| Low                        | -23.4           | 0.76      | -30.94   | 0        | *** |
| High                       | 11.46           | 0.74      | 15.43    | 0        | *** |
| Time                       | 9.72            | 3.66      | 2.65     | 0.008    | **  |
| Time <sup>3</sup> :Prepare | 8.05            | 2.73      | 2.95     | 0.003    | **  |
| Time <sup>3</sup> :Talk    | 6.79            | 2.74      | 2.48     | 0.013    | *   |
| Prepare:Time <sup>2</sup>  | 11.19           | 4.7       | 2.38     | 0.017    | *   |
| Talk:Time <sup>2</sup>     | 18.8            | 4.78      | 3.93     | 0        | *** |
| Time <sup>2</sup> :Low     | 11.12           | 4.78      | 2.33     | 0.02     | *   |
| Time <sup>2</sup> :High    | 22.26           | 4.7       | 4.74     | 0        | *** |
| Prepare:Low                | 2.73            | 1.06      | 2.57     | 0.01     | *   |
| Talk:Low                   | 2.41            | 1.07      | 2.25     | 0.024    | *   |
| Prepare:High               | 3.56            | 1.05      | 3.39     | 0.001    | *** |
| Talk:High                  | 14.26           | 1.06      | 13.45    | 0        | *** |

|                                 |        |      |       |       |     |
|---------------------------------|--------|------|-------|-------|-----|
| Prepare:Time                    | -17.99 | 4.7  | -3.83 | 0     | *** |
| Talk:Time                       | -9.74  | 4.78 | -2.04 | 0.042 | *   |
| Low:Time                        | -9     | 4.78 | -1.88 | 0.06  | .   |
| High:Time                       | -0.51  | 4.7  | -0.11 | 0.913 |     |
| Prepare:Time <sup>2</sup> :Low  | -6.93  | 6.72 | -1.03 | 0.302 |     |
| Talk:Time <sup>2</sup> :Low     | -13.89 | 6.76 | -2.05 | 0.04  | *   |
| Prepare:Time <sup>2</sup> :High | -13.68 | 6.65 | -2.06 | 0.04  | *   |
| Talk:Time <sup>2</sup> :High    | -30.42 | 6.7  | -4.54 | 0     | *** |
| Prepare:Low:Time                | 18.21  | 6.73 | 2.71  | 0.007 | **  |
| Talk:Low:Time                   | 0.21   | 6.76 | 0.03  | 0.975 |     |
| Prepare:High:Time               | 14.03  | 6.65 | 2.11  | 0.035 | *   |
| Talk:High:Time                  | -11.85 | 6.7  | -1.77 | 0.077 | .   |

---
